# Supplementary material
Source: PubMed Central journal article supplement (PMC9389436)
Supplement: jamaophthalmol-e223130-s002.pdf [file jamaophthalmol-e223130-s002.pdf]

\*First name, last name, and suffix (if applicable) are required and will appear in PubMed.

| <b>*Group Name: DRCR Retina Network</b>  |                   |                              |                  |                          |                                          |                                                         |                                                                                                       |
|------------------------------------------|-------------------|------------------------------|------------------|--------------------------|------------------------------------------|---------------------------------------------------------|-------------------------------------------------------------------------------------------------------|
| <b>*First Name and Middle Initial(s)</b> | <b>*Last Name</b> | <b>*Suffix (eg, Jr, III)</b> | Academic Degrees | Institution              | Location (city, state/province, country) | Role or Contribution, eg, chair, principal investigator | Group (if more than 1 Group listed in the byline) and/or Subgroup (eg, Steering Committee)            |
| Abla M                                   | Harara            |                              |                  | Retina Research Center   | Austin, TX US                            |                                                         |                                                                                                       |
| Angela N.                                | Palacios          |                              |                  | Retina Research Center   | Austin, TX US                            |                                                         |                                                                                                       |
| Brian B.                                 | Berger            |                              | MD               | Retina Research Center   | Austin, TX US                            |                                                         |                                                                                                       |
| Boris                                    | Corak             |                              | BS               | Retina Research Center   | Austin, TX US                            |                                                         |                                                                                                       |
| Bianca                                   | Luong             |                              |                  | Retina Research Center   | Austin, TX US                            |                                                         |                                                                                                       |
| Chirag D.                                | Jhaveri           |                              | MD               | Retina Research Center   | Austin, TX US                            |                                                         | Network Vice Chair 2016 - 2018; Executive Committee 2016 - present; Steering Committee 2022 - present |
| Daniela Mariel                           | Wilson            |                              |                  | Retina Research Center   | Austin, TX US                            |                                                         |                                                                                                       |
| Gowtham                                  | Jonna             |                              | MD               | Retina Research Center   | Austin, TX US                            |                                                         |                                                                                                       |
| Ivana                                    | Gunderson         |                              |                  | Retina Research Center   | Austin, TX US                            |                                                         |                                                                                                       |
| Kimberly                                 | Hosein            |                              |                  | Retina Research Center   | Austin, TX US                            |                                                         |                                                                                                       |
| Ryan M.                                  | Reid              |                              |                  | Retina Research Center   | Austin, TX US                            |                                                         |                                                                                                       |
| Saradha                                  | Chexal            |                              | MD               | Retina Research Center   | Austin, TX US                            |                                                         |                                                                                                       |
| Tori                                     | Moore             |                              | BS               | Retina Research Center   | Austin, TX US                            |                                                         |                                                                                                       |
| Tina A                                   | Seidu             |                              |                  | Retina Research Center   | Austin, TX US                            |                                                         |                                                                                                       |
| Valerie                                  | Gatavaski         |                              |                  | Retina Research Center   | Austin, TX US                            |                                                         |                                                                                                       |
| Yong                                     | Ren               |                              |                  | Retina Research Center   | Austin, TX US                            |                                                         |                                                                                                       |
| Bradley A.                               | Stern             |                              |                  | Henry Ford Health System | DETROIT, MI US                           |                                                         |                                                                                                       |
| Celia E                                  | Benvenuto         |                              |                  | Henry Ford Health System | DETROIT, MI US                           |                                                         |                                                                                                       |
| Dinah S                                  | Oude-Reimerink    |                              | COT              | Henry Ford Health System | DETROIT, MI US                           |                                                         |                                                                                                       |
| Jenny                                    | Shaheen           |                              | CRA              | Henry Ford Health System | DETROIT, MI US                           |                                                         |                                                                                                       |
| John                                     | Grybas            |                              |                  | Henry Ford Health System | DETROIT, MI US                           |                                                         |                                                                                                       |
| Julianne                                 | Vitale-Kuhn       |                              |                  | Henry Ford Health System | DETROIT, MI US                           |                                                         |                                                                                                       |
| Jessica L.                               | Staffne           |                              |                  | Henry Ford Health System | DETROIT, MI US                           |                                                         |                                                                                                       |
| Katie M.                                 | Ventimiglia       |                              | BS               | Henry Ford Health System | DETROIT, MI US                           |                                                         |                                                                                                       |

## Supplemental Online Content: Nonauthor Collaborators

\*First name, last name, and suffix (if applicable) are required and will appear in PubMed.

| *First Name and Middle Initial(s) | *Last Name | *Suffix (eg, Jr, III) | Academic Degrees   | Institution                            | Location (city, state/province, country) | Role or Contribution, eg, chair, principal investigator | Group (if more than 1 Group listed in the byline) and/or Subgroup (eg, Steering Committee) |
|-----------------------------------|------------|-----------------------|--------------------|----------------------------------------|------------------------------------------|---------------------------------------------------------|--------------------------------------------------------------------------------------------|
| Megan                             | Allis      |                       | CRA                | Henry Ford Health System               | DETROIT, MI US                           |                                                         |                                                                                            |
| Mary K.                           | Monk       |                       | CCRP               | Henry Ford Health System               | DETROIT, MI US                           |                                                         |                                                                                            |
| Marc E.                           | Thomas     |                       |                    | Henry Ford Health System               | DETROIT, MI US                           |                                                         |                                                                                            |
| Nicole M.                         | Massu      |                       |                    | Henry Ford Health System               | DETROIT, MI US                           |                                                         |                                                                                            |
| Paul Andrew                       | Edwards    |                       | MD                 | Henry Ford Health System               | DETROIT, MI US                           |                                                         |                                                                                            |
| Tracy A.                          | Troszak    |                       | CRA                | Henry Ford Health System               | DETROIT, MI US                           |                                                         |                                                                                            |
| Amber N                           | Irons      |                       |                    | The Medical College of Wisconsin, Inc. | Milwaukee, WI US                         |                                                         |                                                                                            |
| Brittany                          | Rego       |                       |                    | The Medical College of Wisconsin, Inc. | Milwaukee, WI US                         |                                                         |                                                                                            |
| Dennis P.                         | Han        |                       | MD                 | The Medical College of Wisconsin, Inc. | Milwaukee, WI US                         |                                                         |                                                                                            |
| Eleanor                           | Dorsey     |                       | BS                 | The Medical College of Wisconsin, Inc. | Milwaukee, WI US                         |                                                         |                                                                                            |
| Erika                             | Nelson     |                       |                    | The Medical College of Wisconsin, Inc. | Milwaukee, WI US                         |                                                         |                                                                                            |
| Hannah                            | Sheppard   |                       |                    | The Medical College of Wisconsin, Inc. | Milwaukee, WI US                         |                                                         |                                                                                            |
| Joseph R.                         | Beringer   |                       |                    | The Medical College of Wisconsin, Inc. | Milwaukee, WI US                         |                                                         |                                                                                            |
| Judy E.                           | Kim        |                       | MD                 | The Medical College of Wisconsin, Inc. | Milwaukee, WI US                         |                                                         | Executive Committee<br>2015 - 2017, 2019 - 2020                                            |
| Kristy L.                         | Keller     |                       |                    | The Medical College of Wisconsin, Inc. | Milwaukee, WI US                         |                                                         |                                                                                            |
| Krissa L.                         | Packard    |                       |                    | The Medical College of Wisconsin, Inc. | Milwaukee, WI US                         |                                                         |                                                                                            |
| Marriner L.                       | Altmann    |                       | CRA, CPT,<br>OCT-C | The Medical College of Wisconsin, Inc. | Milwaukee, WI US                         |                                                         |                                                                                            |
| Mara                              | Goldberg   |                       |                    | The Medical College of Wisconsin, Inc. | Milwaukee, WI US                         |                                                         |                                                                                            |

## Supplemental Online Content: Nonauthor Collaborators

\*First name, last name, and suffix (if applicable) are required and will appear in PubMed.

| *First Name and Middle Initial(s) | *Last Name  | *Suffix (eg, Jr, III) | Academic Degrees | Institution                            | Location (city, state/province, country) | Role or Contribution, eg, chair, principal investigator | Group (if more than 1 Group listed in the byline) and/or Subgroup (eg, Steering Committee) |
|-----------------------------------|-------------|-----------------------|------------------|----------------------------------------|------------------------------------------|---------------------------------------------------------|--------------------------------------------------------------------------------------------|
| Nickolas                          | Chen        |                       |                  | The Medical College of Wisconsin, Inc. | Milwaukee, WI US                         |                                                         |                                                                                            |
| Pat A.                            | Winter      |                       |                  | The Medical College of Wisconsin, Inc. | Milwaukee, WI US                         |                                                         |                                                                                            |
| Shay                              | Bourgeois   |                       |                  | The Medical College of Wisconsin, Inc. | Milwaukee, WI US                         |                                                         |                                                                                            |
| Samantha                          | Jacobo      |                       |                  | The Medical College of Wisconsin, Inc. | Milwaukee, WI US                         |                                                         |                                                                                            |
| Stephanie J                       | Moebius     |                       |                  | The Medical College of Wisconsin, Inc. | Milwaukee, WI US                         |                                                         |                                                                                            |
| Thomas B.                         | Connor      | Jr                    | MD               | The Medical College of Wisconsin, Inc. | Milwaukee, WI US                         |                                                         |                                                                                            |
| Vicki                             | Barwick     |                       | BS               | The Medical College of Wisconsin, Inc. | Milwaukee, WI US                         |                                                         |                                                                                            |
| Vesper V.                         | Williams    |                       |                  | The Medical College of Wisconsin, Inc. | Milwaukee, WI US                         |                                                         |                                                                                            |
| William J.                        | Wirostko    |                       | M.D.             | The Medical College of Wisconsin, Inc. | Milwaukee, WI US                         |                                                         |                                                                                            |
| A. Thomas                         | Ghuman      |                       | MD               | National Ophthalmic Research Institute | Fort Myers, FL US                        |                                                         |                                                                                            |
| Anita H.                          | Leslie      |                       |                  | National Ophthalmic Research Institute | Fort Myers, FL US                        |                                                         |                                                                                            |
| Ashish G.                         | Sharma      |                       | MD, FACS         | National Ophthalmic Research Institute | Fort Myers, FL US                        |                                                         |                                                                                            |
| Cheryl                            | Kiesel      |                       | COA, ROUB        | National Ophthalmic Research Institute | Fort Myers, FL US                        |                                                         |                                                                                            |
| Danielle                          | Dyshanowitz |                       |                  | National Ophthalmic Research Institute | Fort Myers, FL US                        |                                                         |                                                                                            |
| Eileen                            | Knips       |                       | RN, COA, CRA     | National Ophthalmic Research Institute | Fort Myers, FL US                        |                                                         |                                                                                            |
| Glenn                             | Wing        |                       | MD               | National Ophthalmic Research Institute | Fort Myers, FL US                        |                                                         |                                                                                            |

## Supplemental Online Content: Nonauthor Collaborators

\*First name, last name, and suffix (if applicable) are required and will appear in PubMed.

| *First Name and Middle Initial(s) | *Last Name       | *Suffix (eg, Jr, III) | Academic Degrees | Institution                                 | Location (city, state/province, country) | Role or Contribution, eg, chair, principal investigator | Group (if more than 1 Group listed in the byline) and/or Subgroup (eg, Steering Committee) |
|-----------------------------------|------------------|-----------------------|------------------|---------------------------------------------|------------------------------------------|---------------------------------------------------------|--------------------------------------------------------------------------------------------|
| Joseph P.                         | Walker           |                       | MD               | National Ophthalmic Research Institute      | Fort Myers, FL US                        |                                                         |                                                                                            |
| Paul A.                           | Raskauskas       |                       | MD               | National Ophthalmic Research Institute      | Fort Myers, FL US                        |                                                         |                                                                                            |
| Raymond K.                        | Kiesel           |                       |                  | National Ophthalmic Research Institute      | Fort Myers, FL US                        |                                                         |                                                                                            |
| Deborah K.                        | Schlossman       |                       | MD               | Joslin Diabetes Center                      | Boston, MA US                            |                                                         |                                                                                            |
| Elizabeth S.                      | Weimann          |                       | COT, BS          | Joslin Diabetes Center                      | Boston, MA US                            |                                                         |                                                                                            |
| George S.                         | Sharuk           |                       | MD               | Joslin Diabetes Center                      | Boston, MA US                            |                                                         |                                                                                            |
| Hanna                             | Kwak             |                       |                  | Joslin Diabetes Center                      | Boston, MA US                            |                                                         |                                                                                            |
| Jerry D.                          | Cavallerano      |                       | OD, PhD          | Joslin Diabetes Center                      | Boston, MA US                            |                                                         | Joslin Reading Center                                                                      |
| Jae W                             | Rhee             |                       |                  | Joslin Diabetes Center                      | Boston, MA US                            |                                                         |                                                                                            |
| Konstantina                       | Sampani          |                       |                  | Joslin Diabetes Center                      | Boston, MA US                            |                                                         |                                                                                            |
| Katie V                           | Tran             |                       |                  | Joslin Diabetes Center                      | Boston, MA US                            |                                                         |                                                                                            |
| Leila                             | Bestourous       |                       |                  | Joslin Diabetes Center                      | Boston, MA US                            |                                                         |                                                                                            |
| Linette                           | Miranda          |                       |                  | Joslin Diabetes Center                      | Boston, MA US                            |                                                         |                                                                                            |
| Michael N.                        | Krigman          |                       |                  | Joslin Diabetes Center                      | Boston, MA US                            |                                                         |                                                                                            |
| Margaret E.                       | Stockman         |                       |                  | Joslin Diabetes Center                      | Boston, MA US                            |                                                         |                                                                                            |
| Paul G.                           | Arrigg           |                       | MD               | Joslin Diabetes Center                      | Boston, MA US                            |                                                         |                                                                                            |
| Robert W.                         | Cavicchi         |                       |                  | Joslin Diabetes Center                      | Boston, MA US                            |                                                         |                                                                                            |
| Rita K.                           | Kirby            | Ms.                   |                  | Joslin Diabetes Center                      | Boston, MA US                            |                                                         |                                                                                            |
| Shireen                           | Glynn            |                       |                  | Joslin Diabetes Center                      | Boston, MA US                            |                                                         |                                                                                            |
| Steve L.                          | Papaconstantinou |                       | COT              | Joslin Diabetes Center                      | Boston, MA US                            |                                                         |                                                                                            |
| Sabera T.                         | Shah             |                       | MD               | Joslin Diabetes Center                      | Boston, MA US                            |                                                         |                                                                                            |
| Timothy J.                        | Murtha           |                       | MD               | Joslin Diabetes Center                      | Boston, MA US                            |                                                         |                                                                                            |
| William                           | Carli            |                       | COA              | Joslin Diabetes Center                      | Boston, MA US                            |                                                         |                                                                                            |
| Autumn K.                         | Finch            |                       |                  | Southeast Clinical Research Associates, LLC | Charlotte, NC US                         |                                                         |                                                                                            |
| Angella K.                        | Gentile          |                       |                  | Southeast Clinical Research Associates, LLC | Charlotte, NC US                         |                                                         |                                                                                            |

## Supplemental Online Content: Nonauthor Collaborators

\*First name, last name, and suffix (if applicable) are required and will appear in PubMed.

| *First Name and Middle Initial(s) | *Last Name | *Suffix (eg, Jr, III) | Academic Degrees | Institution                                 | Location (city, state/province, country) | Role or Contribution, eg, chair, principal investigator | Group (if more than 1 Group listed in the byline) and/or Subgroup (eg, Steering Committee) |
|-----------------------------------|------------|-----------------------|------------------|---------------------------------------------|------------------------------------------|---------------------------------------------------------|--------------------------------------------------------------------------------------------|
| Angela K.                         | Price      |                       | MPH              | Southeast Clinical Research Associates, LLC | Charlotte, NC US                         |                                                         |                                                                                            |
| Brittany A                        | Murphy     |                       | BA, COT          | Southeast Clinical Research Associates, LLC | Charlotte, NC US                         |                                                         |                                                                                            |
| Beverly O                         | Rowland    |                       |                  | Southeast Clinical Research Associates, LLC | Charlotte, NC US                         |                                                         |                                                                                            |
| Christina J.                      | Fleming    |                       | BS, CCRP         | Southeast Clinical Research Associates, LLC | Charlotte, NC US                         |                                                         |                                                                                            |
| Courtney                          | Mahr       |                       |                  | Southeast Clinical Research Associates, LLC | Charlotte, NC US                         |                                                         |                                                                                            |
| Carol A                           | Shore      |                       |                  | Southeast Clinical Research Associates, LLC | Charlotte, NC US                         |                                                         |                                                                                            |
| David                             | Browning   |                       | MD, PhD          | Southeast Clinical Research Associates, LLC | Charlotte, NC US                         |                                                         |                                                                                            |
| Donna                             | McClain    |                       | COA              | Southeast Clinical Research Associates, LLC | Charlotte, NC US                         |                                                         |                                                                                            |
| Erica                             | Breglio    |                       |                  | Southeast Clinical Research Associates, LLC | Charlotte, NC US                         |                                                         |                                                                                            |
| Gina M.                           | Lester     |                       | COA              | Southeast Clinical Research Associates, LLC | Charlotte, NC US                         |                                                         |                                                                                            |
| Jenna T.                          | Herby      |                       | BS, CCRC         | Southeast Clinical Research Associates, LLC | Charlotte, NC US                         |                                                         |                                                                                            |
| Kayla A                           | Bratcher   |                       |                  | Southeast Clinical Research Associates, LLC | Charlotte, NC US                         |                                                         |                                                                                            |
| Loraine M.                        | Clark      |                       | COA              | Southeast Clinical Research Associates, LLC | Charlotte, NC US                         |                                                         |                                                                                            |
| Lisa A.                           | Jackson    |                       |                  | Southeast Clinical Research Associates, LLC | Charlotte, NC US                         |                                                         |                                                                                            |
| Lynn                              | Watson     |                       |                  | Southeast Clinical Research Associates, LLC | Charlotte, NC US                         |                                                         |                                                                                            |
| Michael D.                        | McOwen     |                       |                  | Southeast Clinical Research Associates, LLC | Charlotte, NC US                         |                                                         |                                                                                            |

Supplemental Online Content: Nonauthor Collaborators

\*First name, last name, and suffix (if applicable) are required and will appear in PubMed.

| *First Name and Middle Initial(s) | *Last Name      | *Suffix (eg, Jr, III) | Academic Degrees | Institution                                 | Location (city, state/province, country) | Role or Contribution, eg, chair, principal investigator | Group (if more than 1 Group listed in the byline) and/or Subgroup (eg, Steering Committee)            |
|-----------------------------------|-----------------|-----------------------|------------------|---------------------------------------------|------------------------------------------|---------------------------------------------------------|-------------------------------------------------------------------------------------------------------|
| Omar S.                           | Punjabi         |                       | MD               | Southeast Clinical Research Associates, LLC | Charlotte, NC US                         |                                                         |                                                                                                       |
| Swann J                           | Bojaj           |                       |                  | Southeast Clinical Research Associates, LLC | Charlotte, NC US                         |                                                         |                                                                                                       |
| Sarah A.                          | Ennis           |                       |                  | Southeast Clinical Research Associates, LLC | Charlotte, NC US                         |                                                         |                                                                                                       |
| Sherry L.                         | Fredenberg      |                       |                  | Southeast Clinical Research Associates, LLC | Charlotte, NC US                         |                                                         |                                                                                                       |
| Taylor S.                         | Jones           |                       |                  | Southeast Clinical Research Associates, LLC | Charlotte, NC US                         |                                                         |                                                                                                       |
| Teneisha A.                       | Ragin           |                       |                  | Southeast Clinical Research Associates, LLC | Charlotte, NC US                         |                                                         |                                                                                                       |
| Uma M.                            | Balasubramaniam |                       |                  | Southeast Clinical Research Associates, LLC | Charlotte, NC US                         |                                                         |                                                                                                       |
| Blanca                            | Ornelas         |                       |                  | Rush University Medical Center              | Chicago, IL US                           |                                                         |                                                                                                       |
| Brenda                            | Rodriquez       |                       |                  | Rush University Medical Center              | Chicago, IL US                           |                                                         |                                                                                                       |
| Carla                             | Edwards         |                       |                  | Rush University Medical Center              | Chicago, IL US                           |                                                         |                                                                                                       |
| Danielle R.                       | Carns           |                       | BS               | Rush University Medical Center              | Chicago, IL US                           |                                                         |                                                                                                       |
| Eileen E.                         | Tonner          |                       | BS               | Rush University Medical Center              | Chicago, IL US                           |                                                         |                                                                                                       |
| Kisung                            | Woo             |                       |                  | Rush University Medical Center              | Chicago, IL US                           |                                                         |                                                                                                       |
| Len                               | Richine         |                       |                  | Rush University Medical Center              | Chicago, IL US                           |                                                         |                                                                                                       |
| Mathew W.                         | MacCumber       |                       | MD, PhD          | Rush University Medical Center              | Chicago, IL US                           |                                                         | Network Vice Chair 2018 - 2020; Executive Committee 2018 - present; Steering Committee 2022 - present |
| Pauline Townsend                  | Merrill         |                       | MD               | Rush University Medical Center              | Chicago, IL US                           |                                                         |                                                                                                       |
| Sarah                             | Kociborski      |                       |                  | Rush University Medical Center              | Chicago, IL US                           |                                                         |                                                                                                       |
| Ashley M.                         | Harless         |                       |                  | Raj K. Maturi, M.D., P.C.                   | Indianapolis, IN US                      |                                                         |                                                                                                       |
| Charlotte                         | Harris          |                       |                  | Raj K. Maturi, M.D., P.C.                   | Indianapolis, IN US                      |                                                         |                                                                                                       |

## Supplemental Online Content: Nonauthor Collaborators

\*First name, last name, and suffix (if applicable) are required and will appear in PubMed.

| *First Name and Middle Initial(s) | *Last Name | *Suffix (eg, Jr, III) | Academic Degrees | Institution                          | Location (city, state/province, country) | Role or Contribution, eg, chair, principal investigator | Group (if more than 1 Group listed in the byline) and/or Subgroup (eg, Steering Committee) |
|-----------------------------------|------------|-----------------------|------------------|--------------------------------------|------------------------------------------|---------------------------------------------------------|--------------------------------------------------------------------------------------------|
| Lorraine                          | White      |                       |                  | Raj K. Maturi, M.D., P.C.            | Indianapolis, IN US                      |                                                         |                                                                                            |
| Raj K.                            | Maturi     |                       | MD               | Raj K. Maturi, M.D., P.C.            | Indianapolis, IN US                      |                                                         | Executive Committee 2009 - 2011, 2013 - present; Steering Committee 2022 - present         |
| Julie                             | Asher      |                       |                  | Southeastern Retina Associates, P.C. | Knoxville, TN US                         |                                                         |                                                                                            |
| Justin                            | Walsh      |                       |                  | Southeastern Retina Associates, P.C. | Knoxville, TN US                         |                                                         |                                                                                            |
| Jeff                              | Wheeler    |                       |                  | Southeastern Retina Associates, P.C. | Knoxville, TN US                         |                                                         |                                                                                            |
| Katie                             | Milstead   |                       |                  | Southeastern Retina Associates, P.C. | Knoxville, TN US                         |                                                         |                                                                                            |
| Kristina                          | Oliver     |                       |                  | Southeastern Retina Associates, P.C. | Knoxville, TN US                         |                                                         |                                                                                            |
| Lisa                              | Lovelady   |                       |                  | Southeastern Retina Associates, P.C. | Knoxville, TN US                         |                                                         |                                                                                            |
| Nicholas G.                       | Anderson   |                       | MD               | Southeastern Retina Associates, P.C. | Knoxville, TN US                         |                                                         |                                                                                            |
| Patricia                          | Coppola    |                       |                  | Southeastern Retina Associates, P.C. | Knoxville, TN US                         |                                                         |                                                                                            |
| Raul E.                           | Lince      |                       |                  | Southeastern Retina Associates, P.C. | Knoxville, TN US                         |                                                         |                                                                                            |
| R. Keith                          | Shuler     | Jr                    | MD               | Southeastern Retina Associates, P.C. | Knoxville, TN US                         |                                                         |                                                                                            |
| Steve                             | Morris     |                       |                  | Southeastern Retina Associates, P.C. | Knoxville, TN US                         |                                                         |                                                                                            |
| Sarah M.                          | Oelrich    |                       |                  | Southeastern Retina Associates, P.C. | Knoxville, TN US                         |                                                         |                                                                                            |
| Brandon S                         | Gardner    |                       |                  | Johns Hopkins University             | Baltimore, MD US                         |                                                         |                                                                                            |
| Bob                               | Moore      |                       |                  | Johns Hopkins University             | Baltimore, MD US                         |                                                         |                                                                                            |

## Supplemental Online Content: Nonauthor Collaborators

\*First name, last name, and suffix (if applicable) are required and will appear in PubMed.

| *First Name and Middle Initial(s) | *Last Name  | *Suffix (eg, Jr, III) | Academic Degrees | Institution                   | Location (city, state/province, country) | Role or Contribution, eg, chair, principal investigator | Group (if more than 1 Group listed in the byline) and/or Subgroup (eg, Steering Committee) |
|-----------------------------------|-------------|-----------------------|------------------|-------------------------------|------------------------------------------|---------------------------------------------------------|--------------------------------------------------------------------------------------------|
| Dennis                            | Cain        |                       | CRA              | Johns Hopkins University      | Baltimore, MD US                         |                                                         |                                                                                            |
| Deborah                           | Donohue     |                       |                  | Johns Hopkins University      | Baltimore, MD US                         |                                                         |                                                                                            |
| David                             | Emmert      |                       | BA               | Johns Hopkins University      | Baltimore, MD US                         |                                                         |                                                                                            |
| Kemi                              | Adeyemo     |                       |                  | Johns Hopkins University      | Baltimore, MD US                         |                                                         |                                                                                            |
| Lisa K.                           | Levin       |                       |                  | Johns Hopkins University      | Baltimore, MD US                         |                                                         |                                                                                            |
| Mary                              | Frey        |                       | BSc, CCRP        | Johns Hopkins University      | Baltimore, MD US                         |                                                         |                                                                                            |
| Nick                              | Rhoton      |                       | AA               | Johns Hopkins University      | Baltimore, MD US                         |                                                         |                                                                                            |
| Susan                             | Bressler    |                       | MD               | Johns Hopkins University      | Baltimore, MD US                         |                                                         | Executive Committee 2009 - 2019                                                            |
| Sharon D.                         | Solomon     |                       | MD               | Johns Hopkins University      | Baltimore, MD US                         |                                                         | Executive Committee 2021 - present; Steering Committee 2022- present                       |
| Amy L                             | Ford        |                       | COA              | Dean A. McGee Eye Institute   | Oklahoma City, OK US                     |                                                         |                                                                                            |
| Ashley                            | Hughes      |                       |                  | Dean A. McGee Eye Institute   | Oklahoma City, OK US                     |                                                         |                                                                                            |
| Alisha N                          | Brewer      |                       | BA               | Dean A. McGee Eye Institute   | Oklahoma City, OK US                     |                                                         |                                                                                            |
| JoAnn T                           | Booth       |                       |                  | Dean A. McGee Eye Institute   | Oklahoma City, OK US                     |                                                         |                                                                                            |
| Keven W                           | Lunsford    |                       |                  | Dean A. McGee Eye Institute   | Oklahoma City, OK US                     |                                                         |                                                                                            |
| Lauren D.                         | Ukleya      |                       | BS               | Dean A. McGee Eye Institute   | Oklahoma City, OK US                     |                                                         |                                                                                            |
| Russ                              | Burris      |                       |                  | Dean A. McGee Eye Institute   | Oklahoma City, OK US                     |                                                         |                                                                                            |
| Ronald M.                         | Kingsley    |                       | MD               | Dean A. McGee Eye Institute   | Oklahoma City, OK US                     |                                                         |                                                                                            |
| Shannon R.                        | Almeida     |                       |                  | Dean A. McGee Eye Institute   | Oklahoma City, OK US                     |                                                         |                                                                                            |
| Sonny                             | Icks        |                       | COA, CCRC        | Dean A. McGee Eye Institute   | Oklahoma City, OK US                     |                                                         |                                                                                            |
| Vinay A.                          | Shah        |                       | MD               | Dean A. McGee Eye Institute   | Oklahoma City, OK US                     |                                                         |                                                                                            |
| Vanessa A.                        | Bergman     |                       |                  | Dean A. McGee Eye Institute   | Oklahoma City, OK US                     |                                                         |                                                                                            |
| Alessandro A.                     | Castellarin |                       | MD               | California Retina Consultants | SANTA BARBARA, CA US                     |                                                         |                                                                                            |
| Aimee H.                          | Shook       |                       | BS               | California Retina Consultants | SANTA BARBARA, CA US                     |                                                         |                                                                                            |



Supplemental Online Content: Nonauthor Collaborators

\*First name, last name, and suffix (if applicable) are required and will appear in PubMed.

| *First Name and Middle Initial(s) | *Last Name | *Suffix (eg, Jr, III) | Academic Degrees | Institution                                | Location (city, state/province, country) | Role or Contribution, eg, chair, principal investigator | Group (if more than 1 Group listed in the byline) and/or Subgroup (eg, Steering Committee) |
|-----------------------------------|------------|-----------------------|------------------|--------------------------------------------|------------------------------------------|---------------------------------------------------------|--------------------------------------------------------------------------------------------|
| Aimee                             | Walker     |                       |                  | California Retina Consultants              | SANTA BARBARA, CA US                     |                                                         |                                                                                            |
| Dante J.                          | Pieramici  |                       | MD               | California Retina Consultants              | SANTA BARBARA, CA US                     |                                                         |                                                                                            |
| Gina                              | Hong       |                       | BS, BA           | California Retina Consultants              | SANTA BARBARA, CA US                     |                                                         |                                                                                            |
| Kelly                             | Avery      |                       |                  | California Retina Consultants              | SANTA BARBARA, CA US                     |                                                         |                                                                                            |
| Kate M                            | McKee      |                       | BS               | California Retina Consultants              | SANTA BARBARA, CA US                     |                                                         |                                                                                            |
| Matthew                           | Giust      |                       |                  | California Retina Consultants              | SANTA BARBARA, CA US                     |                                                         |                                                                                            |
| Marco A                           | Munoz      |                       |                  | California Retina Consultants              | SANTA BARBARA, CA US                     |                                                         |                                                                                            |
| Sarah                             | Fishbein   |                       |                  | California Retina Consultants              | SANTA BARBARA, CA US                     |                                                         |                                                                                            |
| Alecia B.                         | Camp       |                       |                  | The Ophthalmology Group, LLC               | PADUCAH, KY US                           |                                                         |                                                                                            |
| Carl W.                           | Baker      |                       | MD               | The Ophthalmology Group, LLC               | PADUCAH, KY US                           |                                                         | Network Vice Chair 2011-2013,2017-2019;<br>Executive Committee 2009 - 2019                 |
| Jil D                             | Baker      |                       | MT, ASCP         | The Ophthalmology Group, LLC               | PADUCAH, KY US                           |                                                         |                                                                                            |
| Kylie S.                          | Sedberry   |                       |                  | The Ophthalmology Group, LLC               | PADUCAH, KY US                           |                                                         |                                                                                            |
| Lynnette F.                       | Lambert    |                       | COT              | The Ophthalmology Group, LLC               | PADUCAH, KY US                           |                                                         |                                                                                            |
| Margaret J.                       | Orr        |                       | COA              | The Ophthalmology Group, LLC               | PADUCAH, KY US                           |                                                         |                                                                                            |
| Sonya L                           | Alcaraz    |                       |                  | The Ophthalmology Group, LLC               | PADUCAH, KY US                           |                                                         |                                                                                            |
| Samantha                          | Kettler    |                       |                  | The Ophthalmology Group, LLC               | PADUCAH, KY US                           |                                                         |                                                                                            |
| Tracey M.                         | Caldwell   |                       | CCRC             | The Ophthalmology Group, LLC               | PADUCAH, KY US                           |                                                         |                                                                                            |
| Abigail                           | Miller     |                       |                  | Retina-Vitreous Surgeons of Central NY, PC | Liverpool, NY US                         |                                                         |                                                                                            |

## Supplemental Online Content: Nonauthor Collaborators

\*First name, last name, and suffix (if applicable) are required and will appear in PubMed.

| *First Name and Middle Initial(s) | *Last Name  | *Suffix (eg, Jr, III) | Academic Degrees | Institution                                    | Location (city, state/province, country) | Role or Contribution, eg, chair, principal investigator | Group (if more than 1 Group listed in the byline) and/or Subgroup (eg, Steering Committee) |
|-----------------------------------|-------------|-----------------------|------------------|------------------------------------------------|------------------------------------------|---------------------------------------------------------|--------------------------------------------------------------------------------------------|
| Christine M.                      | Dorr        |                       |                  | Retina-Vitreous Surgeons of Central NY, PC     | Liverpool, NY US                         |                                                         |                                                                                            |
| G. Robert                         | Hampton     |                       | MD               | Retina-Vitreous Surgeons of Central NY, PC     | Liverpool, NY US                         |                                                         |                                                                                            |
| Jamin S.                          | Brown       |                       | MD               | Retina-Vitreous Surgeons of Central NY, PC     | Liverpool, NY US                         |                                                         |                                                                                            |
| Jeffrey P                         | Barker      |                       |                  | Retina-Vitreous Surgeons of Central NY, PC     | Liverpool, NY US                         |                                                         |                                                                                            |
| Kevin I.                          | Rosenberg   |                       | MD               | Retina-Vitreous Surgeons of Central NY, PC     | Liverpool, NY US                         |                                                         |                                                                                            |
| Lynn M.                           | Kwasniewski |                       |                  | Retina-Vitreous Surgeons of Central NY, PC     | Liverpool, NY US                         |                                                         |                                                                                            |
| Laurie J.                         | Sienkiewicz |                       |                  | Retina-Vitreous Surgeons of Central NY, PC     | Liverpool, NY US                         |                                                         |                                                                                            |
| Lisa                              | Spuches     |                       |                  | Retina-Vitreous Surgeons of Central NY, PC     | Liverpool, NY US                         |                                                         |                                                                                            |
| Michelle L.                       | Manley      |                       |                  | Retina-Vitreous Surgeons of Central NY, PC     | Liverpool, NY US                         |                                                         |                                                                                            |
| Nicole E.                         | Robarge     |                       |                  | Retina-Vitreous Surgeons of Central NY, PC     | Liverpool, NY US                         |                                                         |                                                                                            |
| Stefanie R.                       | DeSantis    |                       | BS               | Retina-Vitreous Surgeons of Central NY, PC     | Liverpool, NY US                         |                                                         |                                                                                            |
| Teresa M.                         | DeForge     |                       |                  | Retina-Vitreous Surgeons of Central NY, PC     | Liverpool, NY US                         |                                                         |                                                                                            |
| Alexander J.                      | Brucker     |                       | MD               | The Trustees of the University of Pennsylvania | Philadelphia, PA US                      |                                                         |                                                                                            |
| Benjamin J.                       | Kim         |                       | MD               | The Trustees of the University of Pennsylvania | Philadelphia, PA US                      |                                                         |                                                                                            |
| Jim M.                            | Berger      |                       |                  | The Trustees of the University of Pennsylvania | Philadelphia, PA US                      |                                                         |                                                                                            |
| Joan C.                           | DuPont      |                       | CRC              | The Trustees of the University of Pennsylvania | Philadelphia, PA US                      |                                                         |                                                                                            |

## Supplemental Online Content: Nonauthor Collaborators

\*First name, last name, and suffix (if applicable) are required and will appear in PubMed.

| *First Name and Middle Initial(s) | *Last Name | *Suffix (eg, Jr, III) | Academic Degrees | Institution                                           | Location (city, state/province, country) | Role or Contribution, eg, chair, principal investigator | Group (if more than 1 Group listed in the byline) and/or Subgroup (eg, Steering Committee) |
|-----------------------------------|------------|-----------------------|------------------|-------------------------------------------------------|------------------------------------------|---------------------------------------------------------|--------------------------------------------------------------------------------------------|
| Sheri                             | Drossner   |                       | MSW              | The Trustees of the University of Pennsylvania        | Philadelphia, PA US                      |                                                         |                                                                                            |
| Sara                              | Freeman    |                       |                  | The Trustees of the University of Pennsylvania        | Philadelphia, PA US                      |                                                         |                                                                                            |
| Ashley                            | Studebaker |                       |                  | John A. Wells, III MD DBA Palmetto Retina Center, LLC | WEST COLUMBIA, SC US                     |                                                         |                                                                                            |
| John F.                           | Payne      |                       | MD               | John A. Wells, III MD DBA Palmetto Retina Center, LLC | WEST COLUMBIA, SC US                     |                                                         |                                                                                            |
| John A.                           | Wells      | III                   | MD, FACS         | John A. Wells, III MD DBA Palmetto Retina Center, LLC | WEST COLUMBIA, SC US                     |                                                         |                                                                                            |
| Robbin                            | Spivey     |                       |                  | John A. Wells, III MD DBA Palmetto Retina Center, LLC | WEST COLUMBIA, SC US                     |                                                         |                                                                                            |
| Tiffany N.                        | Ogbuewu    |                       |                  | John A. Wells, III MD DBA Palmetto Retina Center, LLC | WEST COLUMBIA, SC US                     |                                                         |                                                                                            |
| Tiffany R.                        | Swinford   |                       |                  | John A. Wells, III MD DBA Palmetto Retina Center, LLC | WEST COLUMBIA, SC US                     |                                                         |                                                                                            |
| Adrienne                          | Guillory   |                       |                  | Retina Consultants of Texas, PA                       | Bellaire, TX US                          |                                                         |                                                                                            |
| Amy                               | Hutson     |                       |                  | Retina Consultants of Texas, PA                       | Bellaire, TX US                          |                                                         |                                                                                            |
| Amy C.                            | Schefler   |                       | MD               | Retina Consultants of Texas, PA                       | Bellaire, TX US                          |                                                         |                                                                                            |
| Ankoo R.                          | Shah       |                       | MD               | Retina Consultants of Texas, PA                       | Bellaire, TX US                          |                                                         |                                                                                            |
| Belinda A.                        | Almanza    |                       |                  | Retina Consultants of Texas, PA                       | Bellaire, TX US                          |                                                         |                                                                                            |
| Brenda                            | Dives      |                       |                  | Retina Consultants of Texas, PA                       | Bellaire, TX US                          |                                                         |                                                                                            |
| Beau A                            | Richter    |                       |                  | Retina Consultants of Texas, PA                       | Bellaire, TX US                          |                                                         |                                                                                            |
| Cary A.                           | Stoever    |                       |                  | Retina Consultants of Texas, PA                       | Bellaire, TX US                          |                                                         |                                                                                            |
| David M.                          | Brown      |                       | MD, FACS         | Retina Consultants of Texas, PA                       | Bellaire, TX US                          |                                                         |                                                                                            |
| Danee                             | Foerster   |                       |                  | Retina Consultants of Texas, PA                       | Bellaire, TX US                          |                                                         |                                                                                            |
| David                             | Garcia     |                       |                  | Retina Consultants of Texas, PA                       | Bellaire, TX US                          |                                                         |                                                                                            |
| Diana                             | Rodriguez  |                       |                  | Retina Consultants of Texas, PA                       | Bellaire, TX US                          |                                                         |                                                                                            |
| Daniel                            | Park       |                       |                  | Retina Consultants of Texas, PA                       | Bellaire, TX US                          |                                                         |                                                                                            |
| Eric                              | Chen       |                       | MD               | Retina Consultants of Texas, PA                       | Bellaire, TX US                          |                                                         |                                                                                            |
| Eric N.                           | Kegley     |                       |                  | Retina Consultants of Texas, PA                       | Bellaire, TX US                          |                                                         |                                                                                            |

## Supplemental Online Content: Nonauthor Collaborators

\*First name, last name, and suffix (if applicable) are required and will appear in PubMed.

| *First Name and Middle Initial(s) | *Last Name     | *Suffix (eg, Jr, III) | Academic Degrees | Institution                                 | Location (city, state/province, country) | Role or Contribution, eg, chair, principal investigator | Group (if more than 1 Group listed in the byline) and/or Subgroup (eg, Steering Committee) |
|-----------------------------------|----------------|-----------------------|------------------|---------------------------------------------|------------------------------------------|---------------------------------------------------------|--------------------------------------------------------------------------------------------|
| Elizabeth                         | Quellar        |                       |                  | Retina Consultants of Texas, PA             | Bellaire, TX US                          |                                                         |                                                                                            |
| Garret L                          | Twining        |                       |                  | Retina Consultants of Texas, PA             | Bellaire, TX US                          |                                                         |                                                                                            |
| Heather                           | Koger-Grifaldo |                       |                  | Retina Consultants of Texas, PA             | Bellaire, TX US                          |                                                         |                                                                                            |
| Ilsa                              | Ortega         |                       |                  | Retina Consultants of Texas, PA             | Bellaire, TX US                          |                                                         |                                                                                            |
| Jolene                            | Carranza       |                       | COA              | Retina Consultants of Texas, PA             | Bellaire, TX US                          |                                                         |                                                                                            |
| James C.                          | Major          | Jr                    | MD               | Retina Consultants of Texas, PA             | Bellaire, TX US                          |                                                         |                                                                                            |
| Kimberly                          | Williamson     |                       |                  | Retina Consultants of Texas, PA             | Bellaire, TX US                          |                                                         |                                                                                            |
| Lindsay                           | Burt           |                       |                  | Retina Consultants of Texas, PA             | Bellaire, TX US                          |                                                         |                                                                                            |
| Luis R.                           | Salinas        |                       |                  | Retina Consultants of Texas, PA             | Bellaire, TX US                          |                                                         |                                                                                            |
| Lisa M                            | Wolff          |                       |                  | Retina Consultants of Texas, PA             | Bellaire, TX US                          |                                                         |                                                                                            |
| Matthew S.                        | Benz           |                       | MD               | Retina Consultants of Texas, PA             | Bellaire, TX US                          |                                                         |                                                                                            |
| Maura A                           | Estes          |                       |                  | Retina Consultants of Texas, PA             | Bellaire, TX US                          |                                                         |                                                                                            |
| Miranda F                         | James          |                       |                  | Retina Consultants of Texas, PA             | Bellaire, TX US                          |                                                         |                                                                                            |
| Meredith                          | Berry          |                       |                  | Retina Consultants of Texas, PA             | Bellaire, TX US                          |                                                         |                                                                                            |
| Melina                            | Vela           |                       |                  | Retina Consultants of Texas, PA             | Bellaire, TX US                          |                                                         |                                                                                            |
| Nubia                             | Landaverde     |                       |                  | Retina Consultants of Texas, PA             | Bellaire, TX US                          |                                                         |                                                                                            |
| Nina A.                           | Webb           |                       |                  | Retina Consultants of Texas, PA             | Bellaire, TX US                          |                                                         |                                                                                            |
| Richard H.                        | Fish           |                       | MD, FACS         | Retina Consultants of Texas, PA             | Bellaire, TX US                          |                                                         |                                                                                            |
| Rosa Y.                           | Kim            |                       | MD               | Retina Consultants of Texas, PA             | Bellaire, TX US                          |                                                         |                                                                                            |
| Rebecca                           | Yee            |                       |                  | Retina Consultants of Texas, PA             | Bellaire, TX US                          |                                                         |                                                                                            |
| Sadia Y                           | Karani         |                       |                  | Retina Consultants of Texas, PA             | Bellaire, TX US                          |                                                         |                                                                                            |
| Stacy M.                          | Supapo         |                       |                  | Retina Consultants of Texas, PA             | Bellaire, TX US                          |                                                         |                                                                                            |
| Tamara L                          | Dodel          |                       |                  | Retina Consultants of Texas, PA             | Bellaire, TX US                          |                                                         |                                                                                            |
| Tyneisha                          | McCoy          |                       |                  | Retina Consultants of Texas, PA             | Bellaire, TX US                          |                                                         |                                                                                            |
| Tien P.                           | Wong           |                       | MD               | Retina Consultants of Texas, PA             | Bellaire, TX US                          |                                                         |                                                                                            |
| Veronica A.                       | Sneed          |                       |                  | Retina Consultants of Texas, PA             | Bellaire, TX US                          |                                                         |                                                                                            |
| Cassandra J.                      | Barnhart       |                       | MPH              | University of North Carolina at Chapel Hill | CHAPEL HILL, NC US                       |                                                         |                                                                                            |
| Debra                             | Cantrell       |                       |                  | University of North Carolina at Chapel Hill | CHAPEL HILL, NC US                       |                                                         |                                                                                            |

## Supplemental Online Content: Nonauthor Collaborators

\*First name, last name, and suffix (if applicable) are required and will appear in PubMed.

| *First Name and Middle Initial(s) | *Last Name | *Suffix (eg, Jr, III) | Academic Degrees | Institution                                 | Location (city, state/province, country) | Role or Contribution, eg, chair, principal investigator | Group (if more than 1 Group listed in the byline) and/or Subgroup (eg, Steering Committee) |
|-----------------------------------|------------|-----------------------|------------------|---------------------------------------------|------------------------------------------|---------------------------------------------------------|--------------------------------------------------------------------------------------------|
| Elizabeth L.                      | DuBose     |                       | MPH              | University of North Carolina at Chapel Hill | CHAPEL HILL, NC US                       |                                                         |                                                                                            |
| Houston P                         | Sharpe     |                       |                  | University of North Carolina at Chapel Hill | CHAPEL HILL, NC US                       |                                                         |                                                                                            |
| Jan Niklas                        | Ulrich     |                       | MD               | University of North Carolina at Chapel Hill | CHAPEL HILL, NC US                       |                                                         |                                                                                            |
| Kanika A                          | Bhansali   |                       |                  | University of North Carolina at Chapel Hill | CHAPEL HILL, NC US                       |                                                         |                                                                                            |
| Rona Lyn                          | Esquejo    |                       |                  | University of North Carolina at Chapel Hill | CHAPEL HILL, NC US                       |                                                         |                                                                                            |
| Seema                             | Garg       |                       | MD, PhD          | University of North Carolina at Chapel Hill | CHAPEL HILL, NC US                       |                                                         |                                                                                            |
| Sean                              | Grout      |                       |                  | University of North Carolina at Chapel Hill | CHAPEL HILL, NC US                       |                                                         |                                                                                            |
| Allen                             | McKinney   |                       |                  | Florida Retina Consultants                  | Lakeland, FL US                          |                                                         |                                                                                            |
| Brenda J.                         | Bobbitt    |                       |                  | Florida Retina Consultants                  | Lakeland, FL US                          |                                                         |                                                                                            |
| Ceara L                           | Wendel     |                       |                  | Florida Retina Consultants                  | Lakeland, FL US                          |                                                         |                                                                                            |
| Damanda F.                        | Fagan      |                       |                  | Florida Retina Consultants                  | Lakeland, FL US                          |                                                         |                                                                                            |
| Jacqueline                        | Andrews    |                       |                  | Florida Retina Consultants                  | Lakeland, FL US                          |                                                         |                                                                                            |
| Krystal Nikki                     | Holmes     |                       |                  | Florida Retina Consultants                  | Lakeland, FL US                          |                                                         |                                                                                            |
| Karen L                           | Seyez      |                       | COT              | Florida Retina Consultants                  | Lakeland, FL US                          |                                                         |                                                                                            |
| Kimberly A.                       | Williamson |                       |                  | Florida Retina Consultants                  | Lakeland, FL US                          |                                                         |                                                                                            |
| Nader                             | Moinfar    |                       | MD, MPH          | Florida Retina Consultants                  | Lakeland, FL US                          |                                                         |                                                                                            |
| Paige N.                          | Walters    |                       |                  | Florida Retina Consultants                  | Lakeland, FL US                          |                                                         |                                                                                            |
| Steve                             | Carlton    |                       |                  | Florida Retina Consultants                  | Lakeland, FL US                          |                                                         |                                                                                            |
| Shannon M                         | Rehling    |                       |                  | Florida Retina Consultants                  | Lakeland, FL US                          |                                                         |                                                                                            |
| Shana E                           | Williams   |                       |                  | Florida Retina Consultants                  | Lakeland, FL US                          |                                                         |                                                                                            |
| Tiara L.                          | Reed       |                       |                  | Florida Retina Consultants                  | Lakeland, FL US                          |                                                         |                                                                                            |
| Amber R                           | VandeVelde |                       | RN               | Retina Associates, P.A.                     | Lenexa, KS US                            |                                                         |                                                                                            |
| Frank T.                          | Yeager     |                       |                  | Retina Associates, P.A.                     | Lenexa, KS US                            |                                                         |                                                                                            |
| Gregory M.                        | Fox        |                       | MD               | Retina Associates, P.A.                     | Lenexa, KS US                            |                                                         |                                                                                            |
| Ivan R.                           | Batlle     |                       | MD               | Retina Associates, P.A.                     | Lenexa, KS US                            |                                                         |                                                                                            |

## Supplemental Online Content: Nonauthor Collaborators

\*First name, last name, and suffix (if applicable) are required and will appear in PubMed.

| *First Name and Middle Initial(s) | *Last Name  | *Suffix (eg, Jr, III) | Academic Degrees | Institution              | Location (city, state/province, country) | Role or Contribution, eg, chair, principal investigator | Group (if more than 1 Group listed in the byline) and/or Subgroup (eg, Steering Committee) |
|-----------------------------------|-------------|-----------------------|------------------|--------------------------|------------------------------------------|---------------------------------------------------------|--------------------------------------------------------------------------------------------|
| Kiersten                          | Bruce       |                       |                  | Retina Associates, P.A.  | Lenexa, KS US                            |                                                         |                                                                                            |
| Katherine                         | Pippin      |                       |                  | Retina Associates, P.A.  | Lenexa, KS US                            |                                                         |                                                                                            |
| Lexie R.                          | Ainley      |                       |                  | Retina Associates, P.A.  | Lenexa, KS US                            |                                                         |                                                                                            |
| Ravi S. J.                        | Singh       |                       | MD               | Retina Associates, P.A.  | Lenexa, KS US                            |                                                         |                                                                                            |
| Ashley M                          | Adamo       |                       |                  | Retina Northwest, PC     | Portland, OR US                          |                                                         |                                                                                            |
| Adrian                            | Guardado    |                       |                  | Retina Northwest, PC     | Portland, OR US                          |                                                         |                                                                                            |
| Apurva K.                         | Patel       |                       | MD               | Retina Northwest, PC     | Portland, OR US                          |                                                         |                                                                                            |
| Brian S                           | Puckett     |                       |                  | Retina Northwest, PC     | Portland, OR US                          |                                                         |                                                                                            |
| Christine                         | Hoerner     |                       |                  | Retina Northwest, PC     | Portland, OR US                          |                                                         |                                                                                            |
| Colin                             | Ma          |                       | MD               | Retina Northwest, PC     | Portland, OR US                          |                                                         |                                                                                            |
| David J                           | Clark       |                       |                  | Retina Northwest, PC     | Portland, OR US                          |                                                         |                                                                                            |
| Inessa M                          | Flato       |                       |                  | Retina Northwest, PC     | Portland, OR US                          |                                                         |                                                                                            |
| Joshua                            | Cohen       |                       |                  | Retina Northwest, PC     | Portland, OR US                          |                                                         |                                                                                            |
| Margaret E                        | Charpentier |                       |                  | Retina Northwest, PC     | Portland, OR US                          |                                                         |                                                                                            |
| Marcia                            | Kopfer      |                       | BS, COT          | Retina Northwest, PC     | Portland, OR US                          |                                                         |                                                                                            |
| Mark A.                           | Peters      |                       | MD, FACS         | Retina Northwest, PC     | Portland, OR US                          |                                                         |                                                                                            |
| Pualani                           | Smith       |                       |                  | Retina Northwest, PC     | Portland, OR US                          |                                                         |                                                                                            |
| Paul S.                           | Tlucek      |                       | MD               | Retina Northwest, PC     | Portland, OR US                          |                                                         |                                                                                            |
| Stephen                           | Hobbs       |                       |                  | Retina Northwest, PC     | Portland, OR US                          |                                                         |                                                                                            |
| Stephanie L.                      | Ho          |                       | BA               | Retina Northwest, PC     | Portland, OR US                          |                                                         |                                                                                            |
| Ashley M.                         | Metzger     |                       |                  | Elman Retina Group, P.A. | Baltimore, MD US                         |                                                         |                                                                                            |
| Alesia K                          | McCalla     |                       |                  | Elman Retina Group, P.A. | Baltimore, MD US                         |                                                         |                                                                                            |
| Amy                               | Thompson    |                       |                  | Elman Retina Group, P.A. | Baltimore, MD US                         |                                                         |                                                                                            |
| Christine                         | Ringrose    |                       |                  | Elman Retina Group, P.A. | Baltimore, MD US                         |                                                         |                                                                                            |
| Dallas R.                         | Sandler     |                       |                  | Elman Retina Group, P.A. | Baltimore, MD US                         |                                                         |                                                                                            |
| Henry A.                          | Leder       |                       | MD               | Elman Retina Group, P.A. | Baltimore, MD US                         |                                                         |                                                                                            |
| Jennifer L.                       | Belz        |                       |                  | Elman Retina Group, P.A. | Baltimore, MD US                         |                                                         |                                                                                            |
| JoAnn                             | Starr       |                       |                  | Elman Retina Group, P.A. | Baltimore, MD US                         |                                                         |                                                                                            |
| Jennifer L.                       | Simmons     |                       |                  | Elman Retina Group, P.A. | Baltimore, MD US                         |                                                         |                                                                                            |

## Supplemental Online Content: Nonauthor Collaborators

\*First name, last name, and suffix (if applicable) are required and will appear in PubMed.

| *First Name and Middle Initial(s) | *Last Name  | *Suffix (eg, Jr, III) | Academic Degrees  | Institution                                                                     | Location (city, state/province, country) | Role or Contribution, eg, chair, principal investigator | Group (if more than 1 Group listed in the byline) and/or Subgroup (eg, Steering Committee) |
|-----------------------------------|-------------|-----------------------|-------------------|---------------------------------------------------------------------------------|------------------------------------------|---------------------------------------------------------|--------------------------------------------------------------------------------------------|
| Peggy R                           | Orr         |                       | MPH, BSN,RN, COMT | Elman Retina Group, P.A.                                                        | Baltimore, MD US                         |                                                         |                                                                                            |
| Peter                             | Sotirakos   |                       |                   | Elman Retina Group, P.A.                                                        | Baltimore, MD US                         |                                                         |                                                                                            |
| Pamela V.                         | Singletary  |                       | COA               | Elman Retina Group, P.A.                                                        | Baltimore, MD US                         |                                                         |                                                                                            |
| Terri                             | Cain        |                       |                   | Elman Retina Group, P.A.                                                        | Baltimore, MD US                         |                                                         |                                                                                            |
| Teresa                            | Coffey      |                       |                   | Elman Retina Group, P.A.                                                        | Baltimore, MD US                         |                                                         |                                                                                            |
| Tiffany M                         | Carter      |                       |                   | Elman Retina Group, P.A.                                                        | Baltimore, MD US                         |                                                         |                                                                                            |
| Twyla J                           | Robinson    |                       |                   | Elman Retina Group, P.A.                                                        | Baltimore, MD US                         |                                                         |                                                                                            |
| Chirag P.                         | Shah        |                       | MD, MPH           | Ophthalmic Consultants of Boston                                                | Boston, MA US                            |                                                         |                                                                                            |
| Dominique                         | Cammarata   |                       |                   | Ophthalmic Consultants of Boston                                                | Boston, MA US                            |                                                         |                                                                                            |
| Jennifer L.                       | Kruger      |                       |                   | Ophthalmic Consultants of Boston                                                | Boston, MA US                            |                                                         |                                                                                            |
| Lindsey                           | Colegrove   |                       | COA, CCRC         | Ophthalmic Consultants of Boston                                                | Boston, MA US                            |                                                         |                                                                                            |
| Margie                            | Graham      |                       |                   | Ophthalmic Consultants of Boston                                                | Boston, MA US                            |                                                         |                                                                                            |
| Shane T.                          | Gleason     |                       | MS                | Ophthalmic Consultants of Boston                                                | Boston, MA US                            |                                                         |                                                                                            |
| Bryan                             | Noel        |                       |                   | Retina & Vitreous Associates of Kentucky, PSC dba Retina Associates of Kentucky | Lexington, KY US                         |                                                         |                                                                                            |
| Catherine                         | Damron      |                       |                   | Retina & Vitreous Associates of Kentucky, PSC dba Retina Associates of Kentucky | Lexington, KY US                         |                                                         |                                                                                            |
| Diana M.                          | Holcomb     |                       | COA               | Retina & Vitreous Associates of Kentucky, PSC dba Retina Associates of Kentucky | Lexington, KY US                         |                                                         |                                                                                            |
| Edward A                          | Slade       |                       | BA, CRA, COA      | Retina & Vitreous Associates of Kentucky, PSC dba Retina Associates of Kentucky | Lexington, KY US                         |                                                         |                                                                                            |
| Jeanne                            | Van Arsdall |                       |                   | Retina & Vitreous Associates of Kentucky, PSC dba Retina Associates of Kentucky | Lexington, KY US                         |                                                         |                                                                                            |

## Supplemental Online Content: Nonauthor Collaborators

\*First name, last name, and suffix (if applicable) are required and will appear in PubMed.

| *First Name and Middle Initial(s) | *Last Name  | *Suffix (eg, Jr, III) | Academic Degrees   | Institution                                                                     | Location (city, state/province, country) | Role or Contribution, eg, chair, principal investigator | Group (if more than 1 Group listed in the byline) and/or Subgroup (eg, Steering Committee) |
|-----------------------------------|-------------|-----------------------|--------------------|---------------------------------------------------------------------------------|------------------------------------------|---------------------------------------------------------|--------------------------------------------------------------------------------------------|
| Lisa                              | Bicknell    |                       |                    | Retina & Vitreous Associates of Kentucky, PSC dba Retina Associates of Kentucky | Lexington, KY US                         |                                                         |                                                                                            |
| Michelle                          | Buck        |                       | BA, COT            | Retina & Vitreous Associates of Kentucky, PSC dba Retina Associates of Kentucky | Lexington, KY US                         |                                                         |                                                                                            |
| Thomas W.                         | Stone       |                       | MD                 | Retina & Vitreous Associates of Kentucky, PSC dba Retina Associates of Kentucky | Lexington, KY US                         |                                                         |                                                                                            |
| Amina                             | Farooq      |                       | MD                 | Southeast Retina Center, P.C.                                                   | Augusta, GA US                           |                                                         |                                                                                            |
| Brook                             | Parsons     |                       |                    | Southeast Retina Center, P.C.                                                   | Augusta, GA US                           |                                                         |                                                                                            |
| Harinderjit                       | Singh       |                       | MD                 | Southeast Retina Center, P.C.                                                   | Augusta, GA US                           |                                                         |                                                                                            |
| Ken                               | Ivey        |                       | COA                | Southeast Retina Center, P.C.                                                   | Augusta, GA US                           |                                                         |                                                                                            |
| Lindsay Allison                   | Foster      |                       |                    | Southeast Retina Center, P.C.                                                   | Augusta, GA US                           |                                                         |                                                                                            |
| Michele                           | Woodward    |                       |                    | Southeast Retina Center, P.C.                                                   | Augusta, GA US                           |                                                         |                                                                                            |
| Siobhan O.                        | Ortiz       |                       |                    | Southeast Retina Center, P.C.                                                   | Augusta, GA US                           |                                                         |                                                                                            |
| Thomas                            | Bailey      |                       |                    | Southeast Retina Center, P.C.                                                   | Augusta, GA US                           |                                                         |                                                                                            |
| Bharani Krishna                   | Mynampati A |                       | PhD                | University of Florida- Jacksonville                                             | Jacksonville, FL US                      |                                                         |                                                                                            |
| Cheryl L                          | White       |                       |                    | University of Florida- Jacksonville                                             | Jacksonville, FL US                      |                                                         |                                                                                            |
| Ghulam Shabbir                    | Hamdani     |                       | MBBS, MSH, CCRP    | University of Florida- Jacksonville                                             | Jacksonville, FL US                      |                                                         |                                                                                            |
| Jazzmin N                         | Smith       |                       |                    | University of Florida- Jacksonville                                             | Jacksonville, FL US                      |                                                         |                                                                                            |
| Kakarla V.                        | Chalam      |                       | MD, PhD, MBA, FACS | University of Florida- Jacksonville                                             | Jacksonville, FL US                      |                                                         |                                                                                            |
| Kumar                             | Sambhav     |                       | MD                 | University of Florida- Jacksonville                                             | Jacksonville, FL US                      |                                                         |                                                                                            |
| Romesh                            | Babaria     |                       | MS                 | University of Florida- Jacksonville                                             | Jacksonville, FL US                      |                                                         |                                                                                            |
| Sandeep                           | Grover      |                       | MD                 | University of Florida- Jacksonville                                             | Jacksonville, FL US                      |                                                         |                                                                                            |
| Catherine                         | Carroll     |                       |                    | The Board of Trustees of the University of Illinois                             | Chicago, IL US                           |                                                         |                                                                                            |



## Supplemental Online Content: Nonauthor Collaborators

\*First name, last name, and suffix (if applicable) are required and will appear in PubMed.

| *First Name and Middle Initial(s) | *Last Name | *Suffix (eg, Jr, III) | Academic Degrees | Institution                                         | Location (city, state/province, country) | Role or Contribution, eg, chair, principal investigator | Group (if more than 1 Group listed in the byline) and/or Subgroup (eg, Steering Committee) |
|-----------------------------------|------------|-----------------------|------------------|-----------------------------------------------------|------------------------------------------|---------------------------------------------------------|--------------------------------------------------------------------------------------------|
| Felix Y.                          | Chau       |                       | MD               | The Board of Trustees of the University of Illinois | Chicago, IL US                           |                                                         |                                                                                            |
| Jennifer I.                       | Lim        |                       | MD               | The Board of Trustees of the University of Illinois | Chicago, IL US                           |                                                         |                                                                                            |
| Lauren A                          | Talasnik   |                       | MS               | The Board of Trustees of the University of Illinois | Chicago, IL US                           |                                                         |                                                                                            |
| Mark                              | Janowicz   |                       | BS               | The Board of Trustees of the University of Illinois | Chicago, IL US                           |                                                         |                                                                                            |
| Natasa                            | Stankovic  |                       | AAS, COT         | The Board of Trustees of the University of Illinois | Chicago, IL US                           |                                                         |                                                                                            |
| Sarah L                           | Berlatsky  |                       |                  | The Board of Trustees of the University of Illinois | Chicago, IL US                           |                                                         |                                                                                            |
| Marcia                            | Niec       |                       | MS               | The Board of Trustees of the University of Illinois | Chicago, IL US                           |                                                         |                                                                                            |
| Jie                               | Sun        |                       | PhD, MPH         | The Board of Trustees of the University of Illinois | Chicago, IL US                           |                                                         |                                                                                            |
| Tametha                           | Johnson    |                       |                  | The Board of Trustees of the University of Illinois | Chicago, IL US                           |                                                         |                                                                                            |
| Yesenia                           | Ovando     |                       |                  | The Board of Trustees of the University of Illinois | Chicago, IL US                           |                                                         |                                                                                            |
| Brenda                            | Nakoski    |                       |                  | Retinal Consultants of San Antonio                  | San Antonio, TX US                       |                                                         |                                                                                            |
| Calvin E.                         | Mein       |                       | MD               | Retinal Consultants of San Antonio                  | San Antonio, TX US                       |                                                         |                                                                                            |
| Christopher Sean                  | Wienecke   |                       |                  | Retinal Consultants of San Antonio                  | San Antonio, TX US                       |                                                         |                                                                                            |
| Elaine                            | Castillo   |                       |                  | Retinal Consultants of San Antonio                  | San Antonio, TX US                       |                                                         |                                                                                            |
| Jaynee                            | Baker      |                       |                  | Retinal Consultants of San Antonio                  | San Antonio, TX US                       |                                                         |                                                                                            |
| Jonathan                          | San Roman  |                       |                  | Retinal Consultants of San Antonio                  | San Antonio, TX US                       |                                                         |                                                                                            |

## Supplemental Online Content: Nonauthor Collaborators

\*First name, last name, and suffix (if applicable) are required and will appear in PubMed.

| *First Name and Middle Initial(s) | *Last Name | *Suffix (eg, Jr, III) | Academic Degrees | Institution                                                    | Location (city, state/province, country) | Role or Contribution, eg, chair, principal investigator | Group (if more than 1 Group listed in the byline) and/or Subgroup (eg, Steering Committee) |
|-----------------------------------|------------|-----------------------|------------------|----------------------------------------------------------------|------------------------------------------|---------------------------------------------------------|--------------------------------------------------------------------------------------------|
| Lydia                             | Adams      |                       |                  | Retinal Consultants of San Antonio                             | San Antonio, TX US                       |                                                         |                                                                                            |
| Lita                              | Kirschbaum |                       | COA              | Retinal Consultants of San Antonio                             | San Antonio, TX US                       |                                                         |                                                                                            |
| Moises A.                         | Chica      |                       | MD               | Retinal Consultants of San Antonio                             | San Antonio, TX US                       |                                                         |                                                                                            |
| Sara L                            | Cloudt     |                       |                  | Retinal Consultants of San Antonio                             | San Antonio, TX US                       |                                                         |                                                                                            |
| Tori R.                           | Moore      |                       | BS               | Retinal Consultants of San Antonio                             | San Antonio, TX US                       |                                                         |                                                                                            |
| Felix N.                          | Sabates    | Sr                    | MD               | Sabates Eye Centers Research Division                          | KANSAS CITY, MO US                       |                                                         |                                                                                            |
| Gary S.                           | Gallimore  |                       | COMT             | Sabates Eye Centers Research Division                          | KANSAS CITY, MO US                       |                                                         |                                                                                            |
| Yin C.                            | Chen       |                       |                  | Sabates Eye Centers Research Division                          | KANSAS CITY, MO US                       |                                                         |                                                                                            |
| Adrienne C                        | Swann      |                       |                  | Retinal Consultants of Southern California Medical Group, Inc. | WESTLAKE VILLAGE, CA US                  |                                                         |                                                                                            |
| Deborah M.                        | Cadwell    |                       | RN               | Retinal Consultants of Southern California Medical Group, Inc. | WESTLAKE VILLAGE, CA US                  |                                                         |                                                                                            |
| Kenneth R.                        | Diddie     |                       | MD, FACS         | Retinal Consultants of Southern California Medical Group, Inc. | WESTLAKE VILLAGE, CA US                  |                                                         |                                                                                            |
| Taryn F.                          | Boisvert   |                       | RN               | Retinal Consultants of Southern California Medical Group, Inc. | WESTLAKE VILLAGE, CA US                  |                                                         |                                                                                            |
| Carrie D                          | Tessau     |                       | COA              | Wolfe Clinic, P.C.- West Des Moines                            | WEST DES MOINES, IA US                   |                                                         |                                                                                            |
| Jack                              | Bowers     |                       |                  | Wolfe Clinic, P.C.- West Des Moines                            | WEST DES MOINES, IA US                   |                                                         |                                                                                            |
| Jared S.                          | Nielsen    |                       | MD, MS, MBA      | Wolfe Clinic, P.C.- West Des Moines                            | WEST DES MOINES, IA US                   |                                                         |                                                                                            |
| Jay                               | Rostvold   |                       |                  | Wolfe Clinic, P.C.- West Des Moines                            | WEST DES MOINES, IA US                   |                                                         |                                                                                            |

## Supplemental Online Content: Nonauthor Collaborators

\*First name, last name, and suffix (if applicable) are required and will appear in PubMed.

| *First Name and Middle Initial(s) | *Last Name   | *Suffix (eg, Jr, III) | Academic Degrees | Institution                         | Location (city, state/province, country) | Role or Contribution, eg, chair, principal investigator | Group (if more than 1 Group listed in the byline) and/or Subgroup (eg, Steering Committee) |
|-----------------------------------|--------------|-----------------------|------------------|-------------------------------------|------------------------------------------|---------------------------------------------------------|--------------------------------------------------------------------------------------------|
| Jamie                             | Spillman     |                       |                  | Wolfe Clinic, P.C.- West Des Moines | WEST DES MOINES, IA US                   |                                                         |                                                                                            |
| Kyle J.                           | Alliman      |                       | MD               | Wolfe Clinic, P.C.- West Des Moines | WEST DES MOINES, IA US                   |                                                         |                                                                                            |
| Lisa M.                           | Boender      |                       |                  | Wolfe Clinic, P.C.- West Des Moines | WEST DES MOINES, IA US                   |                                                         |                                                                                            |
| Marilyn A.                        | Johnson      |                       |                  | Wolfe Clinic, P.C.- West Des Moines | WEST DES MOINES, IA US                   |                                                         |                                                                                            |
| Marianne                          | Parker       |                       |                  | Wolfe Clinic, P.C.- West Des Moines | WEST DES MOINES, IA US                   |                                                         |                                                                                            |
| Paula L                           | Bix          |                       |                  | Wolfe Clinic, P.C.- West Des Moines | WEST DES MOINES, IA US                   |                                                         |                                                                                            |
| Spencer D                         | Ridgway      |                       |                  | Wolfe Clinic, P.C.- West Des Moines | WEST DES MOINES, IA US                   |                                                         |                                                                                            |
| Tami Jo                           | Woehl        |                       |                  | Wolfe Clinic, P.C.- West Des Moines | WEST DES MOINES, IA US                   |                                                         |                                                                                            |
| Whitney                           | Stonewall    |                       |                  | Wolfe Clinic, P.C.- West Des Moines | WEST DES MOINES, IA US                   |                                                         |                                                                                            |
| Christopher M.                    | Brown        |                       |                  | Ross Eye Institute, SUNY Buffalo    | Buffalo, NY US                           |                                                         |                                                                                            |
| Gareth M.C.                       | Lema         |                       | MD, PhD          | Ross Eye Institute, SUNY Buffalo    | Buffalo, NY US                           |                                                         |                                                                                            |
| Luann                             | Wiechelt     |                       |                  | Ross Eye Institute, SUNY Buffalo    | Buffalo, NY US                           |                                                         |                                                                                            |
| Pradeepa                          | Yoganathan   |                       | MD               | Ross Eye Institute, SUNY Buffalo    | Buffalo, NY US                           |                                                         |                                                                                            |
| Sandra L.                         | Boglione     |                       |                  | Ross Eye Institute, SUNY Buffalo    | Buffalo, NY US                           |                                                         |                                                                                            |
| Chris A.                          | Montesclaros |                       |                  | Austin Retina Associates            | AUSTIN, TX US                            |                                                         |                                                                                            |
| Cory                              | Mangham      |                       |                  | Austin Retina Associates            | AUSTIN, TX US                            |                                                         |                                                                                            |
| Gopal                             | Karsaliya    |                       |                  | Austin Retina Associates            | AUSTIN, TX US                            |                                                         |                                                                                            |
| Phillip V.                        | Le           |                       |                  | Austin Retina Associates            | AUSTIN, TX US                            |                                                         |                                                                                            |
| Robert W.                         | Wong         |                       | MD               | Austin Retina Associates            | AUSTIN, TX US                            |                                                         |                                                                                            |
| Anne Marie                        | Godfrey      |                       |                  | UBC/VGH Eye Care Centre             | VANCOUVER, BC CA                         |                                                         |                                                                                            |
| Aleksandra                        | Kuzmanovic   |                       | MSc, CCRP        | UBC/VGH Eye Care Centre             | VANCOUVER, BC CA                         |                                                         |                                                                                            |

## Supplemental Online Content: Nonauthor Collaborators

\*First name, last name, and suffix (if applicable) are required and will appear in PubMed.

| *First Name and Middle Initial(s) | *Last Name | *Suffix (eg, Jr, III) | Academic Degrees | Institution                                                                                    | Location (city, state/province, country) | Role or Contribution, eg, chair, principal investigator | Group (if more than 1 Group listed in the byline) and/or Subgroup (eg, Steering Committee) |
|-----------------------------------|------------|-----------------------|------------------|------------------------------------------------------------------------------------------------|------------------------------------------|---------------------------------------------------------|--------------------------------------------------------------------------------------------|
| Andrew William                    | Kirker     |                       | MD, FRCSC        | UBC/VGH Eye Care Centre                                                                        | VANCOUVER, BC CA                         |                                                         |                                                                                            |
| Bryan                             | Harrison   |                       |                  | UBC/VGH Eye Care Centre                                                                        | VANCOUVER, BC CA                         |                                                         |                                                                                            |
| Farzin                            | Forooghian |                       | MD, MSc, FRCSC   | UBC/VGH Eye Care Centre                                                                        | VANCOUVER, BC CA                         |                                                         |                                                                                            |
| Garnet Louise                     | Elvena     |                       |                  | UBC/VGH Eye Care Centre                                                                        | VANCOUVER, BC CA                         |                                                         |                                                                                            |
| Laura J.                          | Hall       |                       |                  | UBC/VGH Eye Care Centre                                                                        | VANCOUVER, BC CA                         |                                                         |                                                                                            |
| Bilgin                            | Turhal     |                       | MD               | University Health Network                                                                      | Toronto, ON CA                           |                                                         |                                                                                            |
| Ian                               | Brown      |                       |                  | University Health Network                                                                      | Toronto, ON CA                           |                                                         |                                                                                            |
| Isaac A                           | Kotei      |                       |                  | University Health Network                                                                      | Toronto, ON CA                           |                                                         |                                                                                            |
| Lina                              | Chen       |                       |                  | University Health Network                                                                      | Toronto, ON CA                           |                                                         |                                                                                            |
| Michael Henry                     | Brent      |                       | MD, FRCSC        | University Health Network                                                                      | Toronto, ON CA                           |                                                         |                                                                                            |
| Michelle                          | Moon       |                       |                  | University Health Network                                                                      | Toronto, ON CA                           |                                                         |                                                                                            |
| Olivera                           | Sutakovic  |                       | MD, CCRCII       | University Health Network                                                                      | Toronto, ON CA                           |                                                         |                                                                                            |
| Angela                            | Chang      |                       | BSc, OD          | University of British Columbia & Vancouver Coastal Health Authority & Eduardo Navajas, MD, PhD | Vancouver, BC CA                         |                                                         |                                                                                            |
| Anne-Marie                        | Godfrey    |                       |                  | University of British Columbia & Vancouver Coastal Health Authority & Eduardo Navajas, MD, PhD | Vancouver, BC CA                         |                                                         |                                                                                            |
| Andrew William                    | Kirker     |                       | MD, FRCSC        | University of British Columbia & Vancouver Coastal Health Authority & Eduardo Navajas, MD, PhD | Vancouver, BC CA                         |                                                         |                                                                                            |
| Aleksandra                        | Kuzmanovic |                       |                  | University of British Columbia & Vancouver Coastal Health Authority & Eduardo Navajas, MD, PhD | Vancouver, BC CA                         |                                                         |                                                                                            |

## Supplemental Online Content: Nonauthor Collaborators

\*First name, last name, and suffix (if applicable) are required and will appear in PubMed.

| *First Name and Middle Initial(s) | *Last Name | *Suffix (eg, Jr, III) | Academic Degrees | Institution                                                                                    | Location (city, state/province, country) | Role or Contribution, eg, chair, principal investigator | Group (if more than 1 Group listed in the byline) and/or Subgroup (eg, Steering Committee) |
|-----------------------------------|------------|-----------------------|------------------|------------------------------------------------------------------------------------------------|------------------------------------------|---------------------------------------------------------|--------------------------------------------------------------------------------------------|
| Bryan                             | Harrison   |                       |                  | University of British Columbia & Vancouver Coastal Health Authority & Eduardo Navajas, MD, PhD | Vancouver, BC CA                         |                                                         |                                                                                            |
| David                             | Albiani    |                       |                  | University of British Columbia & Vancouver Coastal Health Authority & Eduardo Navajas, MD, PhD | Vancouver, BC CA                         |                                                         |                                                                                            |
| David A.L.                        | Maberley   |                       | MD, MSc, FRCSC   | University of British Columbia & Vancouver Coastal Health Authority & Eduardo Navajas, MD, PhD | Vancouver, BC CA                         |                                                         |                                                                                            |
| Eduardo Vitor                     | Navajas    |                       | MD, PhD, FRCSC   | University of British Columbia & Vancouver Coastal Health Authority & Eduardo Navajas, MD, PhD | Vancouver, BC CA                         |                                                         |                                                                                            |
| Kelly                             | Grant      |                       |                  | University of British Columbia & Vancouver Coastal Health Authority & Eduardo Navajas, MD, PhD | Vancouver, BC CA                         |                                                         |                                                                                            |
| Khoi A                            | Tran       |                       | MBBS             | University of British Columbia & Vancouver Coastal Health Authority & Eduardo Navajas, MD, PhD | Vancouver, BC CA                         |                                                         |                                                                                            |
| Laura J.                          | Hall       |                       |                  | University of British Columbia & Vancouver Coastal Health Authority & Eduardo Navajas, MD, PhD | Vancouver, BC CA                         |                                                         |                                                                                            |
| Mira                              | Jovanovic  |                       | Msci             | University of British Columbia & Vancouver Coastal Health Authority & Eduardo Navajas, MD, PhD | Vancouver, BC CA                         |                                                         |                                                                                            |

## Supplemental Online Content: Nonauthor Collaborators

\*First name, last name, and suffix (if applicable) are required and will appear in PubMed.

| *First Name and Middle Initial(s) | *Last Name  | *Suffix (eg, Jr, III) | Academic Degrees | Institution                                                                                    | Location (city, state/province, country) | Role or Contribution, eg, chair, principal investigator | Group (if more than 1 Group listed in the byline) and/or Subgroup (eg, Steering Committee) |
|-----------------------------------|-------------|-----------------------|------------------|------------------------------------------------------------------------------------------------|------------------------------------------|---------------------------------------------------------|--------------------------------------------------------------------------------------------|
| Sijia                             | Cao         |                       |                  | University of British Columbia & Vancouver Coastal Health Authority & Eduardo Navajas, MD, PhD | Vancouver, BC CA                         |                                                         |                                                                                            |
| Theresa                           | Wiens       |                       | MSc, CCRP        | University of British Columbia & Vancouver Coastal Health Authority & Eduardo Navajas, MD, PhD | Vancouver, BC CA                         |                                                         |                                                                                            |
| Andrzej                           | Kozbial     |                       |                  | Weill Medical College of Cornell University                                                    | NEW YORK, NY US                          |                                                         |                                                                                            |
| Anton                             | Orlin       |                       | MD               | Weill Medical College of Cornell University                                                    | NEW YORK, NY US                          |                                                         |                                                                                            |
| Courtney Nichole                  | Lenane      |                       |                  | Weill Medical College of Cornell University                                                    | NEW YORK, NY US                          |                                                         |                                                                                            |
| Susan P.                          | Herder      |                       | PA-C             | Weill Medical College of Cornell University                                                    | NEW YORK, NY US                          |                                                         |                                                                                            |
| Szilard                           | Kiss        |                       | MD               | Weill Medical College of Cornell University                                                    | NEW YORK, NY US                          |                                                         |                                                                                            |
| Tom                               | Reeves      |                       |                  | Weill Medical College of Cornell University                                                    | NEW YORK, NY US                          |                                                         |                                                                                            |
| Alan F.                           | Cruess      |                       | MD, FRCS         | Nova Scotia Health Authority                                                                   | HALIFAX, NS CA                           |                                                         |                                                                                            |
| Andrea                            | Dean        |                       | BSc              | Nova Scotia Health Authority                                                                   | HALIFAX, NS CA                           |                                                         |                                                                                            |
| Ann                               | Hoskin-Mott |                       | MD, FRCS         | Nova Scotia Health Authority                                                                   | HALIFAX, NS CA                           |                                                         |                                                                                            |
| Christine                         | Morrison    |                       | BSc              | Nova Scotia Health Authority                                                                   | HALIFAX, NS CA                           |                                                         |                                                                                            |
| Meggie D                          | Caldwell    |                       |                  | Nova Scotia Health Authority                                                                   | HALIFAX, NS CA                           |                                                         |                                                                                            |
| Mitzi                             | Hynes       |                       | COT              | Nova Scotia Health Authority                                                                   | HALIFAX, NS CA                           |                                                         |                                                                                            |
| R. Rishi                          | Gupta       |                       | MD, FRCS, DABO   | Nova Scotia Health Authority                                                                   | HALIFAX, NS CA                           |                                                         |                                                                                            |
| Stacey                            | Durling     |                       |                  | Nova Scotia Health Authority                                                                   | HALIFAX, NS CA                           |                                                         |                                                                                            |

## Supplemental Online Content: Nonauthor Collaborators

\*First name, last name, and suffix (if applicable) are required and will appear in PubMed.

| *First Name and Middle Initial(s) | *Last Name  | *Suffix (eg, Jr, III) | Academic Degrees | Institution                     | Location (city, state/province, country) | Role or Contribution, eg, chair, principal investigator | Group (if more than 1 Group listed in the byline) and/or Subgroup (eg, Steering Committee) |
|-----------------------------------|-------------|-----------------------|------------------|---------------------------------|------------------------------------------|---------------------------------------------------------|--------------------------------------------------------------------------------------------|
| Trina                             | MacDonnell  |                       | OC(C),<br>COMT   | Nova Scotia Health Authority    | HALIFAX, NS CA                           |                                                         |                                                                                            |
| Roy W.                            | Beck        |                       | MD, PhD          | Jaeb Center for Health Research | Tampa, FL US                             | Jaeb Center for Health Research<br>President            | Executive Committee<br>2002 - present                                                      |
| Alyssa                            | Baptista    |                       | BS               | Jaeb Center for Health Research | Tampa, FL US                             |                                                         |                                                                                            |
| Wesley T.                         | Beaulieu    |                       | PhD              | Jaeb Center for Health Research | Tampa, FL US                             |                                                         |                                                                                            |
| Claire T.                         | Calhoun     |                       | MS               | Jaeb Center for Health Research | Tampa, FL US                             |                                                         |                                                                                            |
| Sharon R.                         | Constantine |                       | BS               | Jaeb Center for Health Research | Tampa, FL US                             |                                                         |                                                                                            |
| Isabella                          | Correia     |                       | BS               | Jaeb Center for Health Research | Tampa, FL US                             |                                                         |                                                                                            |
| Brian B.                          | Dale        |                       |                  | Jaeb Center for Health Research | Tampa, FL US                             |                                                         |                                                                                            |
| Simone S.                         | Dupre       |                       | BS               | Jaeb Center for Health Research | Tampa, FL US                             |                                                         |                                                                                            |
| Crystal A.                        | Franklin    |                       | MPH              | Jaeb Center for Health Research | Tampa, FL US                             |                                                         |                                                                                            |
| Sandra                            | Galusic     |                       | MSPH             | Jaeb Center for Health Research | Tampa, FL US                             |                                                         |                                                                                            |
| Meagan                            | Huggins     |                       | BA               | Jaeb Center for Health Research | Tampa, FL US                             |                                                         |                                                                                            |
| Brenda L.                         | Hunter      |                       | BS               | Jaeb Center for Health Research | Tampa, FL US                             |                                                         |                                                                                            |
| Paula A.                          | Johnson     |                       | MPH              | Jaeb Center for Health Research | Tampa, FL US                             |                                                         |                                                                                            |
| Kristin                           | Josic       |                       | PhD              | Jaeb Center for Health Research | Tampa, FL US                             |                                                         |                                                                                            |
| Brittany                          | Kelly       |                       | MSHS             | Jaeb Center for Health Research | Tampa, FL US                             |                                                         |                                                                                            |
| Maureen G.                        | Maguire     |                       | PhD              | Jaeb Center for Health Research | Tampa, FL US                             |                                                         |                                                                                            |
| Britney                           | Meadows     |                       | BS               | Jaeb Center for Health Research | Tampa, FL US                             |                                                         |                                                                                            |
| Cynthia R.                        | Stockdale   |                       | MSPH             | Jaeb Center for Health Research | Tampa, FL US                             |                                                         |                                                                                            |
| Alice                             | Zokruah     |                       | BS               | Jaeb Center for Health Research | Tampa, FL US                             |                                                         |                                                                                            |
| Sangeeta                          | Bhargava    |                       | PhD              | National Eye Institute          | Bethesda, MD US                          |                                                         | Executive Committee<br>2016 - present                                                      |
| Andrew J.                         | Barkmeier   |                       | MD               | Mayo Clinic                     | Rochester, MN US                         |                                                         | Executive Committee<br>2022 - present; Steering<br>Committee 2022 -<br>present             |

Supplemental Online Content: Nonauthor Collaborators

\*First name, last name, and suffix (if applicable) are required and will appear in PubMed.

| *First Name and Middle Initial(s) | *Last Name | *Suffix (eg, Jr, III) | Academic Degrees | Institution                                                           | Location (city, state/province, country) | Role or Contribution, eg, chair, principal investigator | Group (if more than 1 Group listed in the byline) and/or Subgroup (eg, Steering Committee) |
|-----------------------------------|------------|-----------------------|------------------|-----------------------------------------------------------------------|------------------------------------------|---------------------------------------------------------|--------------------------------------------------------------------------------------------|
| Darrell                           | Baskin     |                       | MD               | Retinal Consultants of San Antonio                                    | San Antonio, TX US                       |                                                         | Executive Committee 2021 - present; Steering Committee 2022-present                        |
| Barbra                            | Blodi      |                       | MD               | University of Wisconsin-Madison, Dept of Ophthalmology/Retina Service | Madison, WI US                           |                                                         | Executive Committee 2015 - present                                                         |
| Emily                             | Chew       |                       | MD               | National Eye Institute                                                | Bethesda, MD US                          |                                                         | Executive Committee 2022 - present; Steering Committee 2022 - present                      |
| Frederick L.                      | Ferris     | III                   | MD               | Ophthalmic Research Consultants                                       | Waxhaw, NC US                            |                                                         | Executive Committee 2002 - present; Steering Committee 2022 - present                      |
| Glenn J.                          | Jaffe      |                       | MD               | Duke Eye Center                                                       | Durham, NC US                            |                                                         | Executive Committee 2012 - present                                                         |
| Neil M.                           | Bressler   |                       | MD               | Wilmer Ophthalmological Institute                                     | Baltimore, MD US                         |                                                         | Executive Committee 2006 - 2019; Chair 2006 - 2012                                         |
| Brandon                           | Lujan      |                       | MD               | Casey Reading Center                                                  | Portland, OR US                          |                                                         | Executive Committee 2017 - 2021                                                            |
| Dorothy                           | Tolls      |                       | OD               | Joslin Diabetes Center                                                | Boston, MA US                            |                                                         | Reading Center                                                                             |
| Daniel                            | Sheridan   |                       |                  | Joslin Diabetes Center                                                | Boston, MA US                            |                                                         | Reading Center                                                                             |
| Cloyd M                           | Pitoc      |                       |                  | Joslin Diabetes Center                                                | Boston, MA US                            |                                                         | Reading Center                                                                             |
| Lizzie Anne C                     | Aquino     |                       |                  | Joslin Diabetes Center                                                | Boston, MA US                            |                                                         | Reading Center                                                                             |
| Claude Michael G.                 | Salva      |                       |                  | Joslin Diabetes Center                                                | Boston, MA US                            |                                                         | Reading Center                                                                             |
| Drew                              | Lewis      |                       |                  | Joslin Diabetes Center                                                | Boston, MA US                            |                                                         | Reading Center                                                                             |
| Jeffery                           | Stainback  |                       |                  | Joslin Diabetes Center                                                | Boston, MA US                            |                                                         | Reading Center                                                                             |
| Vijaya                            | Makkena    |                       |                  | Joslin Diabetes Center                                                | Boston, MA US                            |                                                         | Reading Center                                                                             |
| Katrina                           | Winter     |                       | BS               | Duke Eye Center                                                       | Durham, North Carolina US                |                                                         | Reading Center                                                                             |



Supplemental Online Content: Nonauthor Collaborators

\*First name, last name, and suffix (if applicable) are required and will appear in PubMed.

| *First Name and Middle Initial(s) | *Last Name | *Suffix (eg, Jr, III) | Academic Degrees | Institution     | Location (city, state/province, country) | Role or Contribution, eg, chair, principal investigator | Group (if more than 1 Group listed in the byline) and/or Subgroup (eg, Steering Committee) |
|-----------------------------------|------------|-----------------------|------------------|-----------------|------------------------------------------|---------------------------------------------------------|--------------------------------------------------------------------------------------------|
| Adiel                             | Mora       |                       |                  | Duke Eye Center | Durham, North Carolina<br>US             |                                                         | Reading Center                                                                             |
| Chris                             | Harrington |                       |                  | Duke Eye Center | Durham, North Carolina<br>US             |                                                         | Reading Center                                                                             |
| Doc-Lap                           | Vinh       |                       |                  | Duke Eye Center | Durham, North Carolina<br>US             |                                                         | Reading Center                                                                             |
